# Supplementary material for: Bioinspired Electropun Fibrous Materials Based on Poly-3-Hydroxybutyrate and Hemin: Preparation, Physicochemical Properties, and Weathering
Source: MDPI journal article supplement (doi:10.3390/polym14224878), 2022-11-12
Supplement: s1 [file s1]

**Figure S1.** Photo (a) and schematic view of the single-capillary laboratory unit for the electrospinning process (b), where: 1 – protective installation box; 2 – bin with a polymer solution and a capillary; 3 – high voltage source; 4 – stable precipitating electrode, 5 – air pressure regulator.

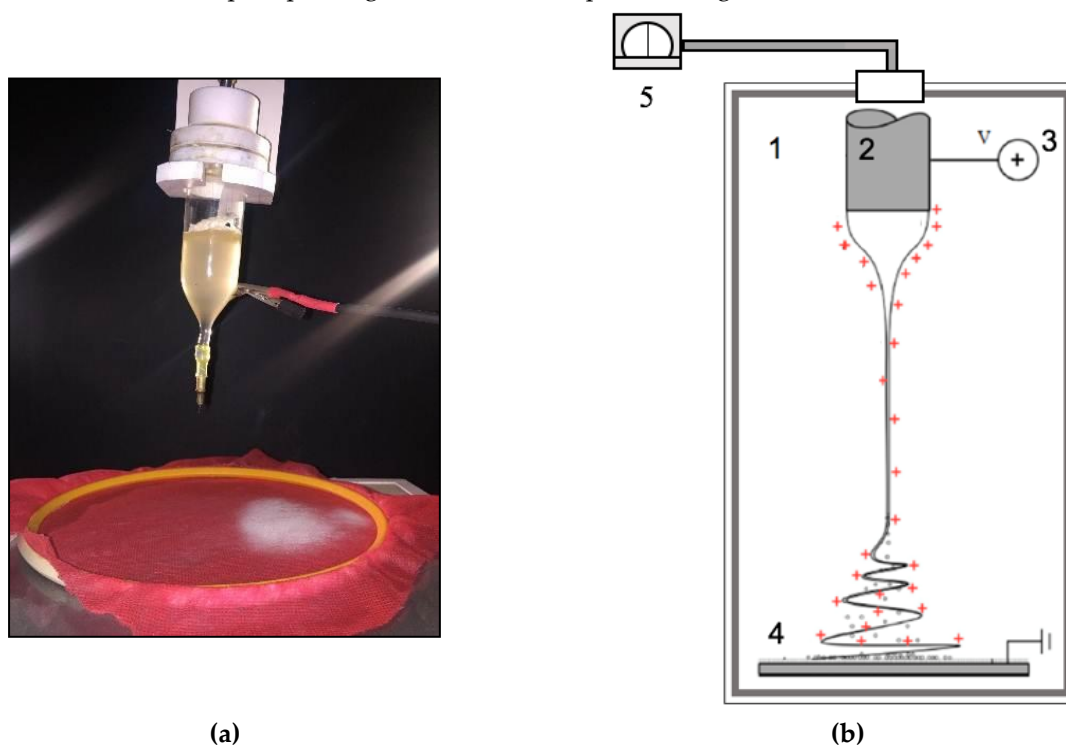

**Figure S2.** Histogram the fibers' size distribution of PHB and H<sub>mi</sub>/PHB nonwoven composites, where: a – 0 wt. %, b – 1 wt. %, c – 3 wt. %, and d – 5 wt. %.

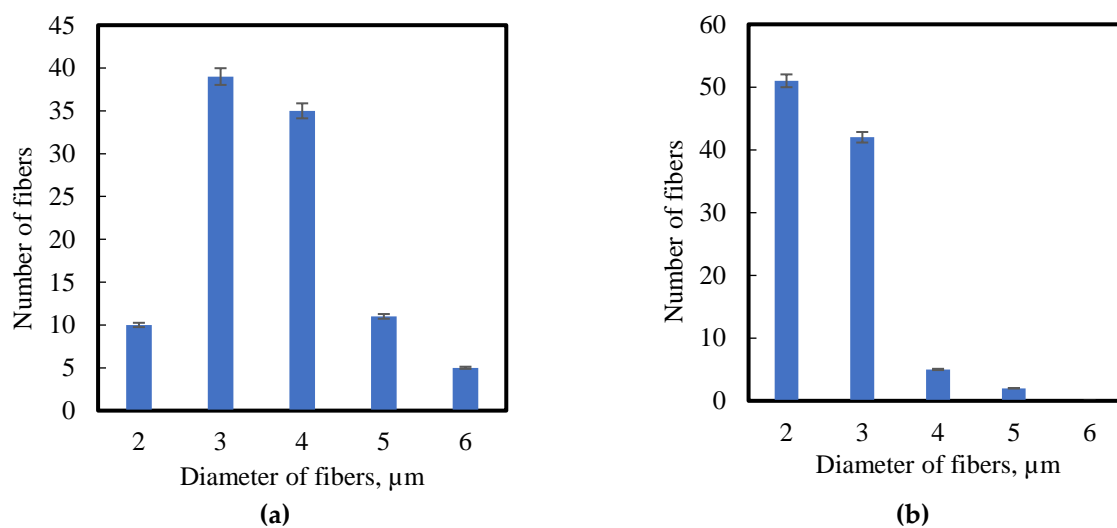

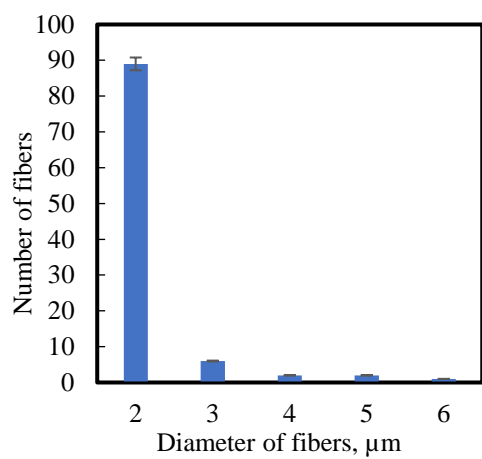

(c)

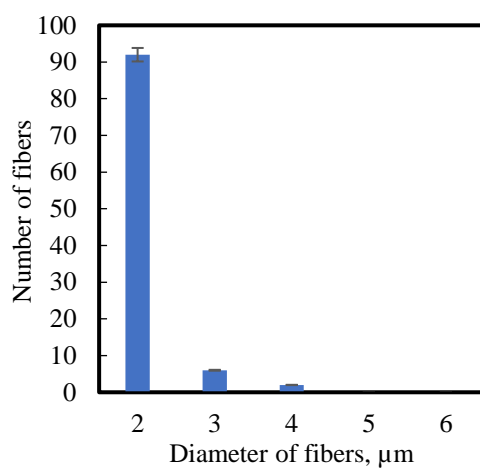

(d)
